# Supplementary material for: Transcriptomics Analysis on Fertility Conversion in Thermosensitive Genetic Male Sterility Line Zhu1S under High Temperature
Source: MDPI journal article supplement (doi:10.3390/agronomy12061255), 2022-05-24
Supplement: s1 [file s1]

## Supplemental datas

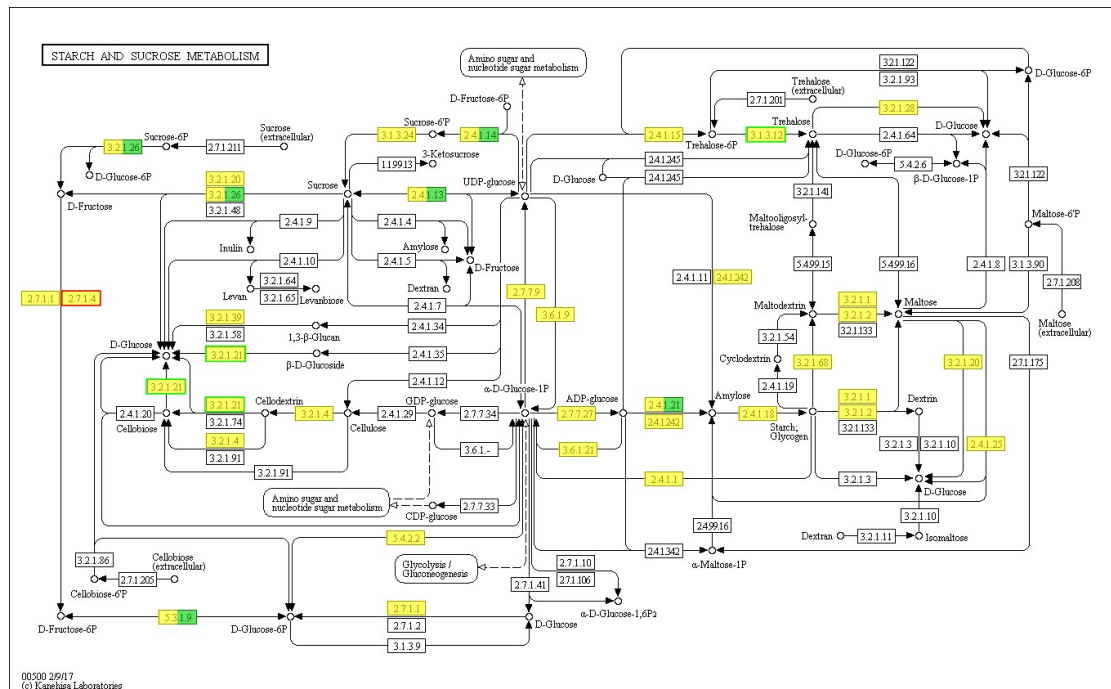

**Supplement Figure S1.** Schematic of starch and sucrose metabolism affected by high temperature in Zhu 1S. The red and green *squares* indicate starch and sucrose metabolism that were up-regulated or down-regulated by high temperature, respectively. The protein processing in starch and sucrose metabolism was prepared using the KEGG web service ([www.genome.jp/kegg/](http://www.genome.jp/kegg/)).





**Table S1. List of PCR Primers**

| Name          | Primer sequences          | Purposes                              |
|---------------|---------------------------|---------------------------------------|
| Os01g0816100F | CGAGGTCGACCTCTACAAGCTC    | Q-PCR analysis of <i>Os01g0816100</i> |
| Os01g0816100R | GTCGCCTTCCAGTACCCTCT      |                                       |
| Os01g0826400F | GTCGTCCTTCTTCAACAGCCC     | Q-PCR analysis of <i>Os01g0826400</i> |
| Os01g0826400R | CTCGTCCTTGCCGCCTTGAT      |                                       |
| Os02g0181300F | GTGCTCGTCGAGGAGGACTTCT    | Q-PCR analysis of <i>Os02g0181300</i> |
| Os02g0181300R | ACCATGTCGCTGAACTGGCTCT    |                                       |
| Os02g0641300F | ACCAGAAGCTCCGCGACTAC      | Q-PCR analysis of <i>Os02g0641300</i> |
| Os02g0641300R | TCATCACCGTCTCCTCCTCC      |                                       |
| Os03g0180900F | GGGGCAGCAGTTCACGATCT      | Q-PCR analysis of <i>Os03g0180900</i> |
| Os03g0180900R | CTTCAGCGACGCCTTCCTC       |                                       |
| Os03g0182800F | AGAGTTTGGCCGTGTCATGTGT    | Q-PCR analysis of <i>Os03g0182800</i> |
| Os03g0182800R | CGCCCCTGTACTTGCTCTTCTT    |                                       |
| Os03g0741100F | TCAGCCAGAGCTACGCCGA       | Q-PCR analysis of <i>Os03g0741100</i> |
| Os03g0741100R | GATCTGGGCCTTCAGCTCCTC     |                                       |
| Os04g0470600F | TGGACGCCCGAGGAGGACAA      | Q-PCR analysis of <i>Os04g0470600</i> |
| Os04g0470600R | AACTCGCCGTGCTTGAGGTCG     |                                       |
| Os05g0343400F | GCGACTTCTCCTTCCACACCA     | Q-PCR analysis of <i>Os05g0343400</i> |
| Os05g0343400R | GCTCCCCCTTCACCTGCTTCT     |                                       |
| Os06g0649000F | AGGACTGCAAGCCCAAGGTCT     | Q-PCR analysis of <i>Os06g0649000</i> |
| Os06g0649000R | CGCTGCACCTTCTTCTTACC      |                                       |
| Os06g0728700F | GTGCCTTGTGAACCAACAGTGATAG | Q-PCR analysis of <i>Os06g0728700</i> |
| Os06g0728700R | AACTGTCCTCCCAAATAGCTTCAA  |                                       |
| Os07g0615200F | GGGAGGCGGAGAGGAAGAA       | Q-PCR analysis of <i>Os07g0615200</i> |
| Os07g0615200R | AACACGAGCACCTTCCCACCAT    |                                       |
| Os08g0157600F | ATAACCACCGTAGATTTAGGAGCAG | Q-PCR analysis of <i>Os08g0157600</i> |
| Os08g0157600R | TTCATCTTCTTCCTCCTTGCTAATC |                                       |
| OsActin1F     | CAATGTGCCAGCTATGTATGTCGCC | Q-PCR analysis of <i>OsActin</i>      |
| OsActin1R     | TTCCCGTTCAGCAGTGGTAGTGAAG |                                       |

**Table S2. Preprocessing results of sequencing data quality**

| Sample   | Raw reads | Clean reads | Clean bases | Valid bases (%) | Q30 (%) |
|----------|-----------|-------------|-------------|-----------------|---------|
| Zhu1s-L1 | 45023554  | 44293650    | 6448062425  | 98.24           | 94.84   |
| Zhu1s-L2 | 50405498  | 49703734    | 7251224961  | 98.32           | 94.95   |
| Zhu1s-H1 | 49168698  | 48175496    | 6873422873  | 98.22           | 94.81   |
| Zhu1s-H2 | 49223546  | 48268758    | 6900912964  | 98.08           | 94.44   |

**Table S3. Differentially expressed genes involved in transcription factor in Zhu 1S under high temperature**

| Identifer    | Fold-change (Zhu 1S-L/Zhu 1S-H) | P-value  | Annotation                                            |
|--------------|---------------------------------|----------|-------------------------------------------------------|
| Os07g0139000 | 123.78                          | 1.00E-02 | Basic helix-loop-helix transcription factor bHLH      |
| Os03g0180900 | 31.05                           | 2.00E-03 | TIFY family transcription factor OsTIFY11c            |
| Os07g0684800 | 26.44                           | 2.00E-04 | NAC domain-containing protein 87                      |
| Os05g0163900 | 17.76                           | 1.00E-03 | Transcription factor bHLH107                          |
| Os03g0182800 | 13.31                           | 1.00E-03 | EREBP transcription factor OsEBP89                    |
| Os01g0246700 | 12.88                           | 1.00E-03 | WRKY transcription factor OsWRKY1                     |
| Os03g0745000 | 10.67                           | 2.00E-03 | Heat shock transcription factor OsHsfA2a              |
| Os12g0123700 | 9                               | 3.00E-04 | NAC transcription factor OsNAC131                     |
| Os01g0826400 | 7.95                            | 5.00E-03 | WRKY transcription factor OsWRKY24                    |
| Os11g0126900 | 6.9                             | 2.00E-06 | NAC transcription factor OsNAC10                      |
| Os05g0343400 | 5                               | 3.00E-02 | WRKY transcription factor OsWRKY53                    |
| Os06g0649000 | 4.19                            | 3.00E-03 | WRKY transcription factor OsWRKY28                    |
| Os01g0868000 | 4                               | 5.00E-01 | EREBP transcription factor OsEREBP2                   |
| Os05g0322900 | 3.69                            | 3.00E-03 | WRKY transcription factor OsWRKY45                    |
| Os01g0159800 | 3.5                             | 2.00E-04 | Basic helix-loop-helix transcription factor bHLH107   |
| Os02g0181300 | 3.46                            | 4.00E-02 | WRKY transcription factor OsWRKY71                    |
| Os01g0954500 | 3.3                             | 2.00E-03 | Lateral root primordium 1 OsLRP1                      |
| Os03g0741100 | 3.15                            | 1.00E-03 | Basic helix-loop-helix transcription factor OsbHLH148 |
| Os02g0724000 | 3.06                            | 2.00E-03 | Constans-like gene DTH2                               |
| Os01g0816100 | 2.89                            | 1.00E-03 | NAC domain transcription factor OsNAC4                |
| Os07g0674800 | 2.81                            | 2.00E-03 | Ethylene-responsive transcription factor RAP2-3       |
| Os07g0615200 | 2.71                            | 1.00E-02 | TIFY family transcription factor OsTIFY10b            |
| Os01g0693400 | 2.56                            | 1.00E-03 | AP2/ERF and B3 domain-containing protein              |
| Os06g0298200 | 2.48                            | 3.00E-03 | CCT domain-containing protein OsCCT22                 |
| Os06g0728700 | -3.69                           | 1.00E-03 | MYB transcription factor OsEPR1                       |
| Os04g0470600 | -11.72                          | 3.00E-02 | MYB transcription factor OsMYB80                      |
| Os08g0157600 | -12.96                          | 2.00E-03 | Circadian clock associated1 OsCCA1                    |
